# Supplementary figures and images for: Congenital absence of a left-sided pericardium
Source: PubMed Central journal article supplement — Eur Heart J Case Rep. 2021 Oct 19;5(11):ytab423. doi: 10.1093/ehjcr/ytab423 (PMC8637791; doi:10.1093/ehjcr/ytab423), 2021-10-19

**Herzfrequenz** 49/min  
**PQ Intervall** 150ms  
**QRS Dauer** 94ms  
**QT/QTc** 482/435ms  
**P-QRS-T Winkel** 31/106/27°  
**P Dauer** 110ms  
**RR/PP Intervall** 1222/1220ms

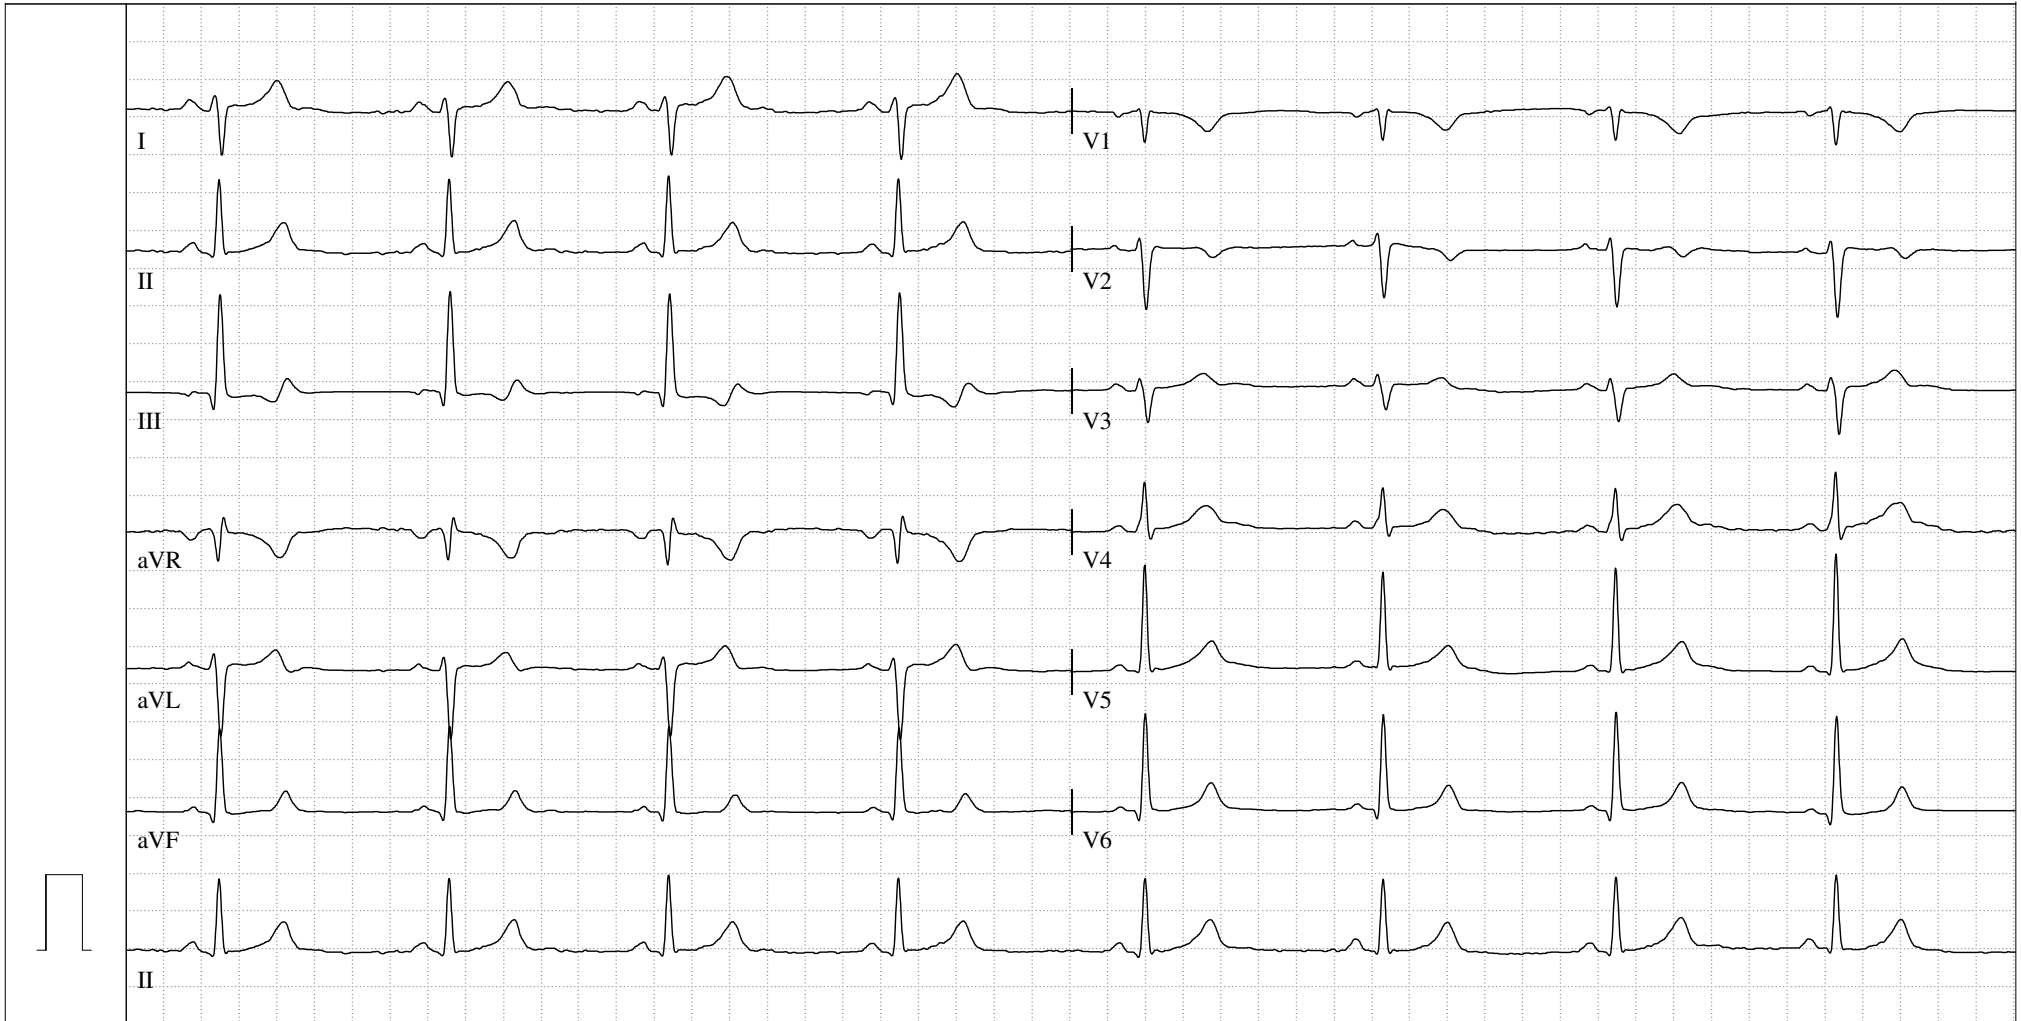

Supplement: ytab423_Supplementary_Data.pdf [file ytab423_Supplementary_Data.pdf]
